# Supplementary material for: A label-free and enzyme-free aptasensor for visual Cd2+detection based on split DNAzyme fragments
Source: Royal Society of Chemistry journal article supplement (doi:10.1039/c9ay00822e), 2019-01-01
Supplement: c9ay00822e1.pdf [file c9ay00822e1.pdf]

## Electronic Supplementary Information

### **A label-free and enzyme-free aptasensor for visual Cd<sup>2+</sup> detection based on split DNAzyme fragments**

Danhua Zhou,<sup>‡a</sup> Wei Wu,<sup>‡b</sup> Qiong Li,<sup>a</sup> Jiafeng Pan,<sup>a</sup> and Junhua Chen<sup>a\*</sup>

<sup>a</sup>Guangdong Key Laboratory of Integrated Agro-environmental Pollution Control and Management, Guangdong Institute of Eco-environmental Science & Technology, Guangzhou 510650, China.

<sup>b</sup>College of Food Science and Engineering, Qingdao Agricultural University, No.700 Changcheng Road, Qingdao, 266109, China.

<sup>‡</sup> The two authors contributed equally to this work.

**\*Corresponding author**

**E-mail: 222chenjunhua@163.com**

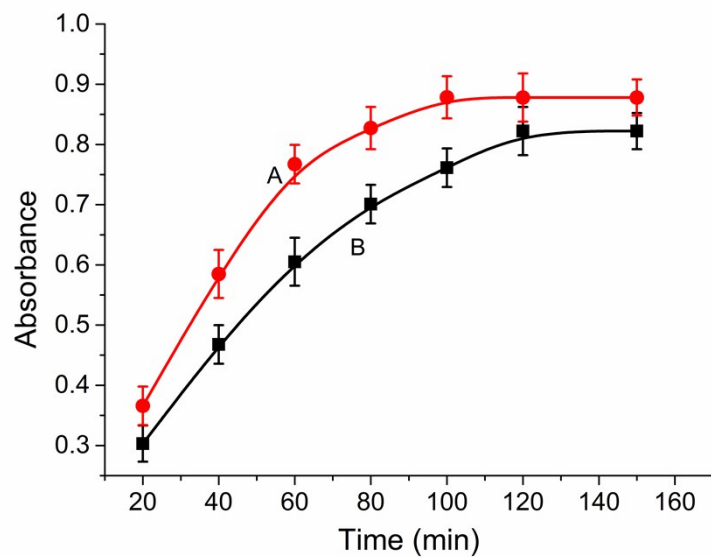

Fig. S1. The reaction kinetics of  $\text{Cd}^{2+}$ -aptamer to open hairpin 1 and DNA1 to open hairpin 1. Curve A: The absorbance of the sensing system containing  $\text{Cd}^{2+}$ -aptamer (100 nM). Curve B: The absorbance of the sensing system containing DNA1 (100 nM). The error bars denote the standard deviation of three independent measurements.

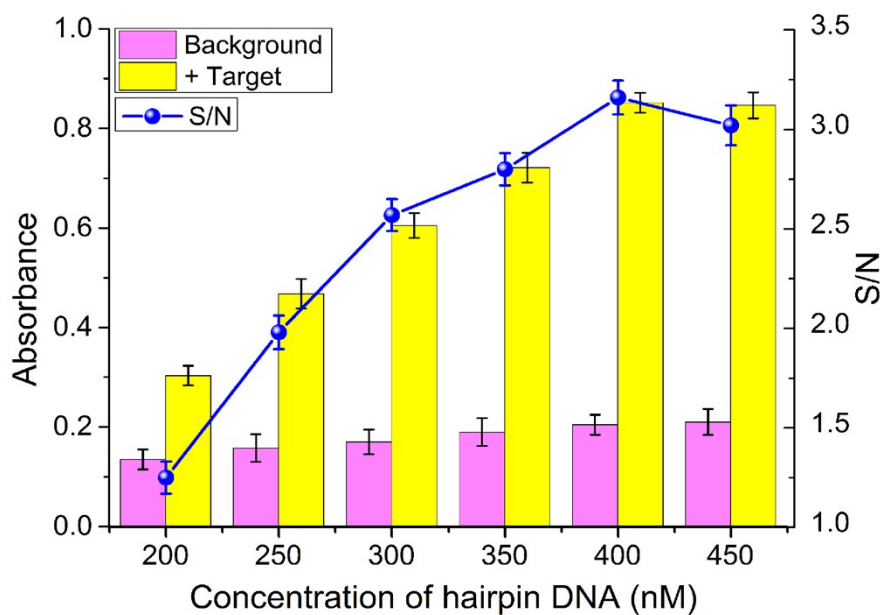

Fig. S2. Effect of concentration of hairpins on the performance of the platform. Keeping a fixed concentration (100 nM) of aptamer DNA, three hairpins were changed to obtain different ratio. The solution also contains  $\text{Cd}^{2+}$  (100 nM) and hemin ( $1\mu\text{M}$ ). The error bars denote the standard deviation of three independent measurements.

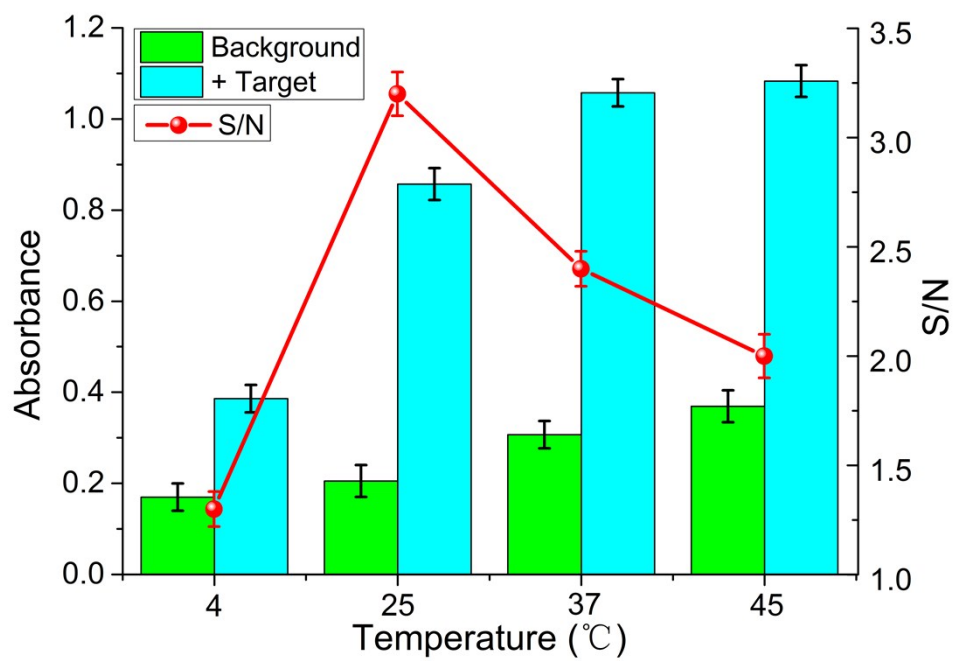

Fig. S3. Effect of the temperature on the performance of the platform. The green histogram represents the absorbance of the solution in the absence of target while the blue one represents the absorbance of the solution with 100 nM Cd<sup>2+</sup>. The red line shows the S/N ratio. The solution also contains aptamer DNA (100 nM), hairpin 1 (400 nM), hairpin 2 (400 nM), hairpin 3 (400 nM), and hemin (1 μM). The error bars denote the standard deviation of three independent measurements.

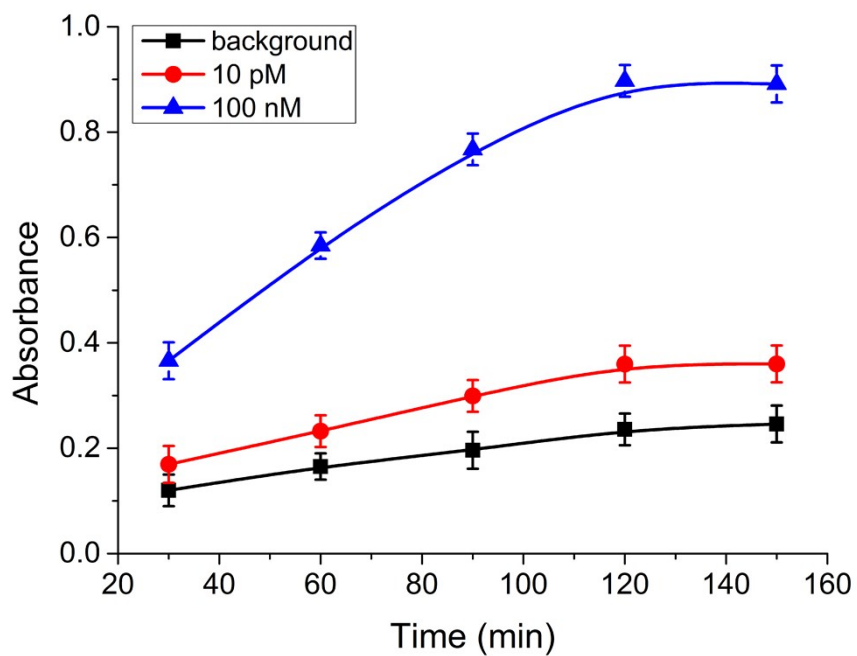

Fig. S4. Effect of the incubate time on the performance of the platform. Time course of absorbance response recorded in the absence (black curve), in the presence of 10 pM  $\text{Cd}^{2+}$  (red curve) and in the presence of 100 nM  $\text{Cd}^{2+}$  (blue curve) respectively. The experiments were performed at room temperature (25 °C). The error bars denote the standard deviation of three independent measurements.
